# Supplementary material for: Mechanical compression creates a quiescent muscle stem cell niche
Source: Springer Nature journal article supplement (doi:10.1038/s42003-023-04411-2), 2023-01-13
Supplement: MOESM1 [file 42003_2023_4411_MOESM1_ESM.pdf]

**Supplementary Information:**

**Supplementary Figures 1-10 and Supplementary Tables 1-3**

**Mechanical Compression Creates a Quiescent Muscle Stem Cell Niche**

**Authors:** <sup>1</sup>Jiaxiang Tao, <sup>2,3</sup>Mohammad Ikbāl Choudhury\*, <sup>2,3</sup>Debonil Maity\*, <sup>4</sup>Taeki Kim,  
<sup>2,3,5</sup>Sean X. Sun and <sup>1,6</sup>Chen-Ming Fan

**Affiliations:**

1. Embryology Department, Carnegie Institution for Science, 3520 San Martin Drive, Baltimore, MD 21218, USA.
2. Department of Mechanical Engineering, Johns Hopkins University, Baltimore, MD, 21218, USA
3. Institution for NanoBioTechnology, Johns Hopkins University, Baltimore, MD, 21218, USA
4. Department of Civil & Systems Engineering, Johns Hopkins University, Baltimore, MD, 21218, USA
5. Center for Cell Dynamics (CCD), Johns Hopkins School of Medicine, Baltimore, MD, 21205, USA
6. Department of Biology, Johns Hopkins University, Baltimore, MD 21218, USA.

\* These authors contributed equally.

Corresponding author: Chen-Ming Fan; [fan@carnegiescience.edu](mailto:fan@carnegiescience.edu)

**Supplementary Figure 1: Cell dimension measurement for *in vivo* intravital imaging of Pax7-YFP cells (a), in both cell height (b) and axial length (c).**

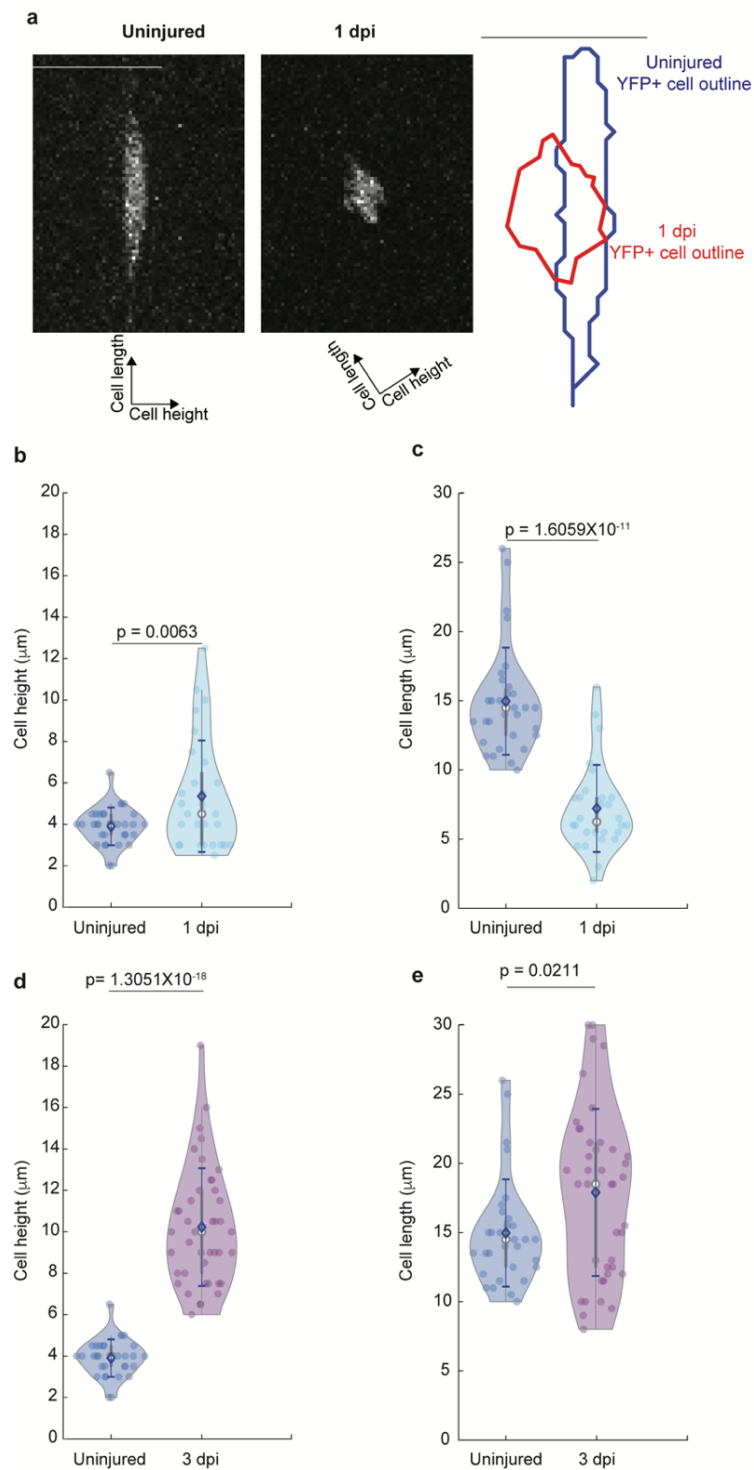

**a**, Representative images of uninjured and 1 dpi cells (Left panel, scale bar, 20  $\mu\text{m}$ , with dimensional direction labeled) and their corresponding shape comparison (Right panel, scale bar, 10  $\mu\text{m}$ ). **b-e**, Quantitative measurements of YFP<sup>+</sup> cells (uninjured, 1 dpi, and 3 dpi) in terms of cell height (**b,d**) and cell length (**c,e**): 31 cells from uninjured muscle: 28 cells from 1 dpi muscle and 42 cells from 3 dpi. Data is presented with mean  $\pm$ s.d. *p*-value was assessed with student's two-tail t-test using MATLAB. Comparison was considered significant if  $p \leq 0.05$ . This data was from Ref. 6. We used it with permission.

**Supplementary Figure 2: Illustration and dimensions of the compression device.**

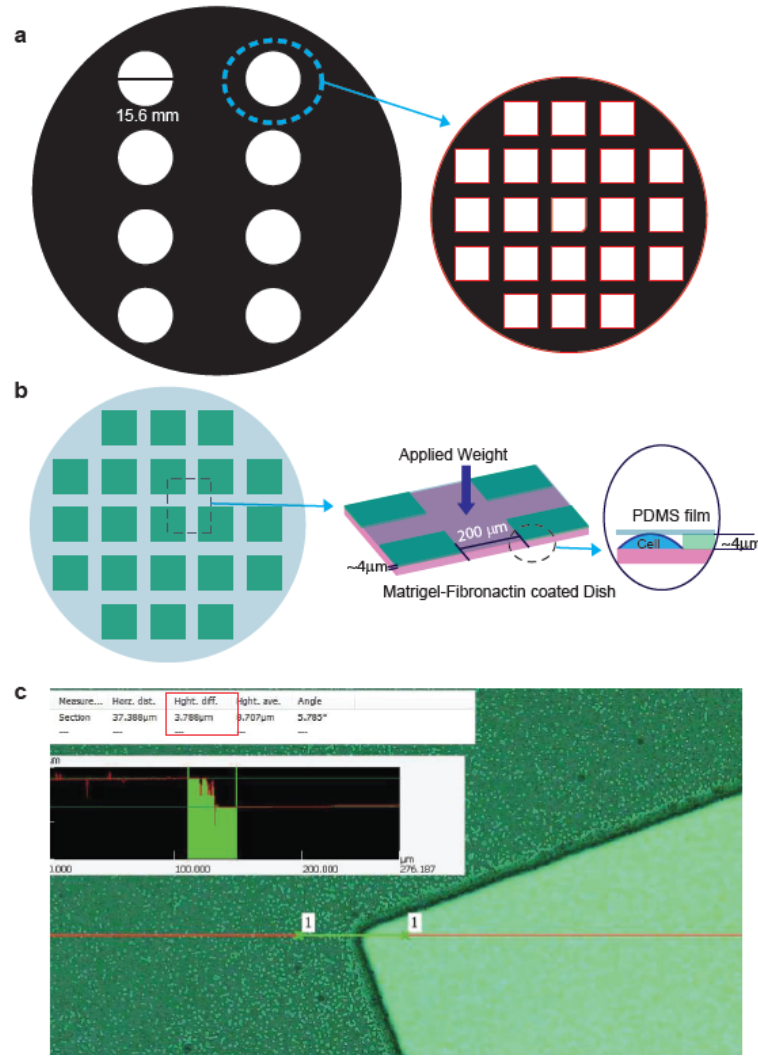

**a-b**, Illustration of compression device mold on a silicon wafer **(a)**, and designed pillar pattern **(b)**. **c**, Top view of compression pillar. **c**, Height measurement of one pillar on the silicon wafer.

**Supplementary Figure 3: 3D confocal measurement of cell height and volume.**

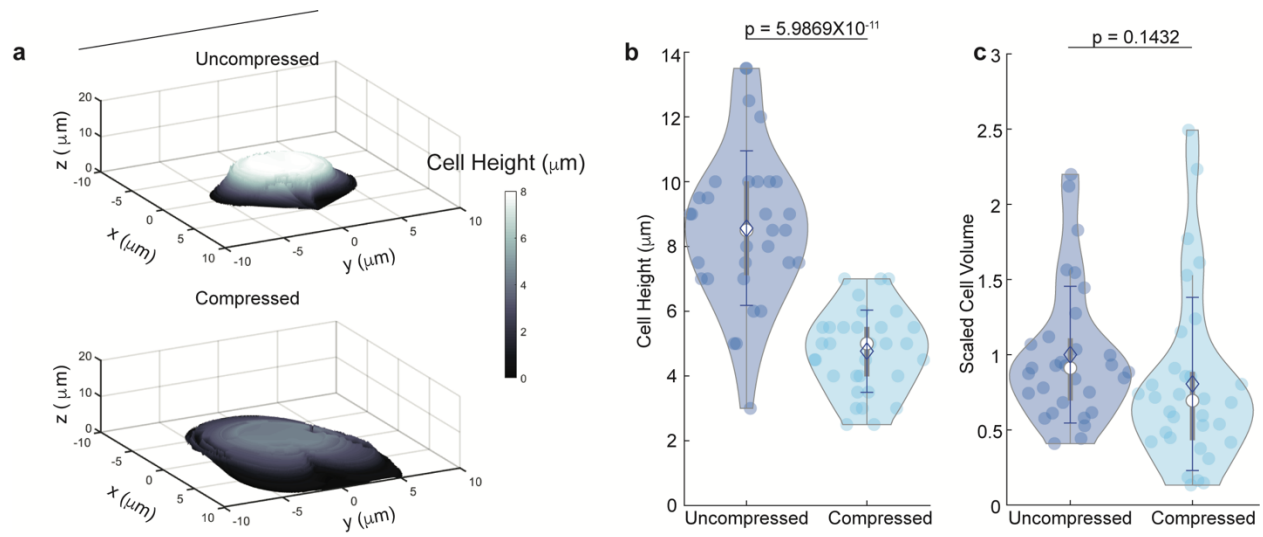

**a**, 3D rendering of uncompressed and compressed cell shape based on confocal data (Scale bar, 20  $\mu\text{m}$ . This scale bar is the projection on the x-y plane). **b-c**, Measured cell height (**b**) and volume (**c**) for uncompressed and compressed cells. ( $n = 5$  for both uncompressed and compressed cells. 30 cells for uncompressed and 33 cells for compressed). Data is presented with mean  $\pm$  s.d.  $p$ -value was assessed with the student's two-tail t-test using MATLAB. The comparison was considered significant if  $p \leq 0.05$ . Cell volume is scaled with the mean volume of the uncompressed cells.

Supplementary Figure 4: Split-channel representative images of MuSCs and others.

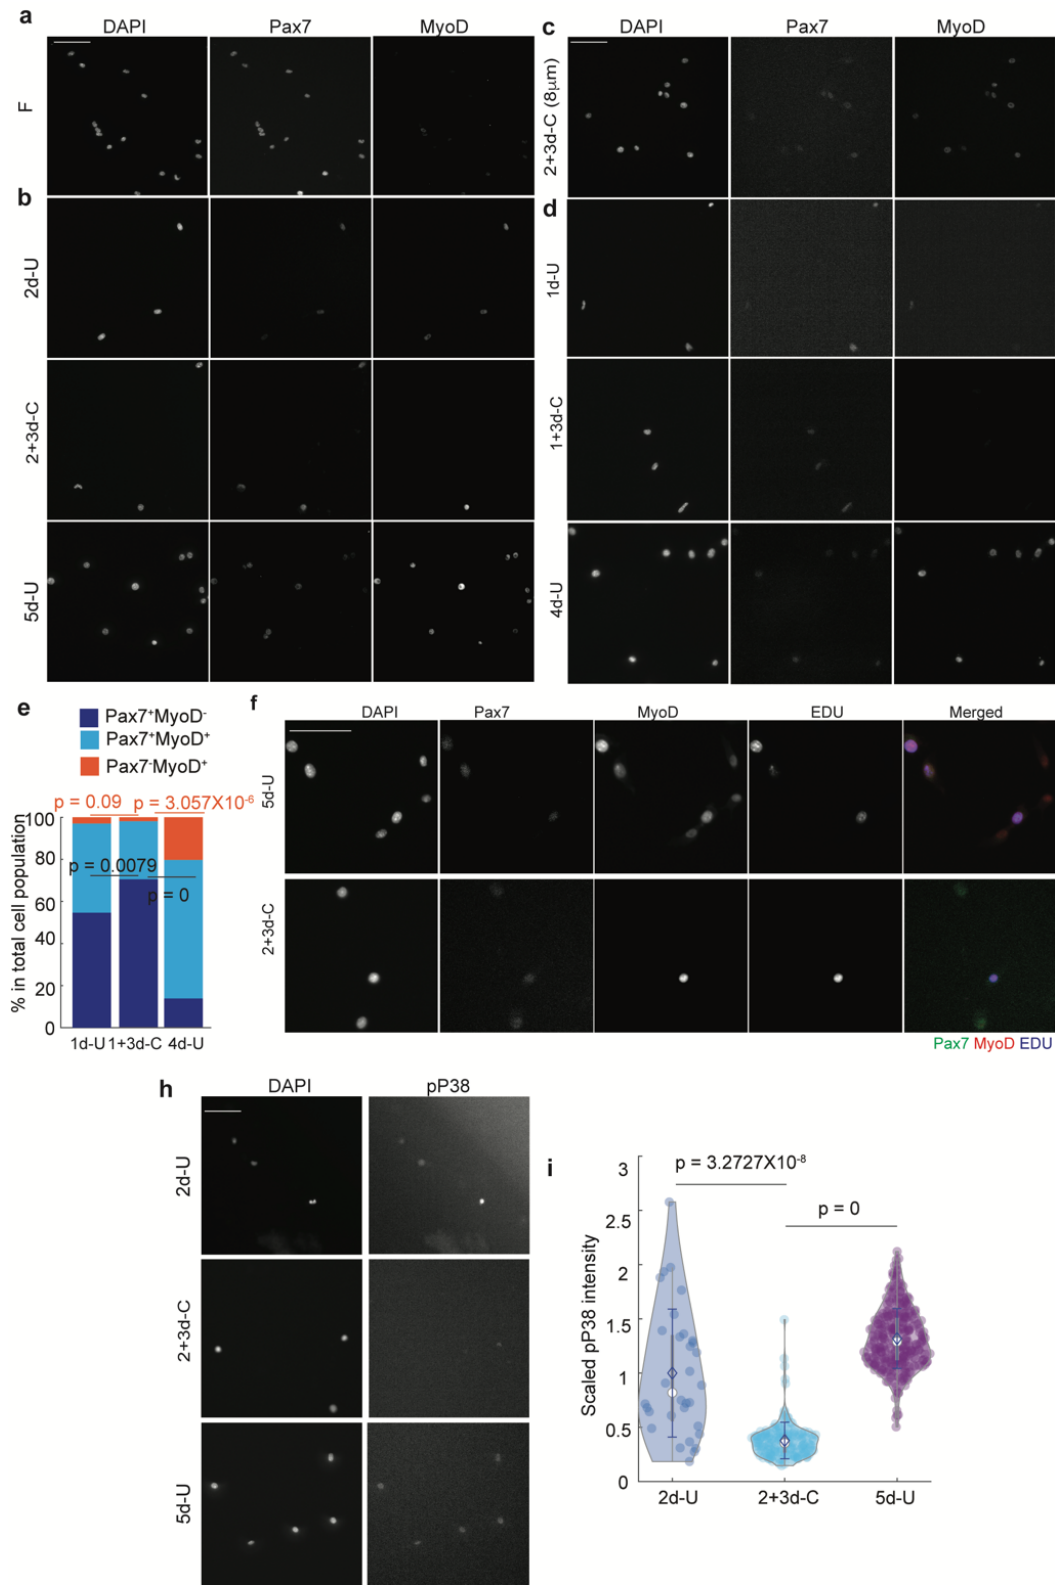

**a-d** , Representative DAPI, Pax7, and MyoD channels for F (Cytospinned) (**a**), 2d-U, 2+3d-C, 5d-U (**b**), 2+3d-C (8 $\mu$ m) (**c**), 1d-U, 1+3d-C, and 4d-U (**d**) cells (Images for 5d-U and 2+3d-C are the split channel images for **Fig. 1b**. Scale bar, 25  $\mu$ m). **e**, Cell fate evaluation of 1d-U, 4d-U, and 1+3d-C cells. (n = 3 for 1d-U, of total 87 cells; n = 3 for 1+3d-C, of total 105 cells; n = 3 for 4d-U, 4,430 cells). **f**, Representative images of DAPI, Pax7, MyoD, and EDU for 5d-U and 2+3d-C (same example as in **Fig. 1f**. Scale bar, 25  $\mu$ m). **g,h**, Representative images (**g**) for pP38 staining of 2d-U, 5d-U, and 2+3d-C cells and the respective intensity quantification (Scale bar, 25  $\mu$ m) (**h**). n = 3 for both 2d-U and 5d-U cells; of total 32 cells for 2d-U and 315 cells for 5d-U. n = 6 for 2+3d-C cells; of total 168 cells. Data in (**e**) was presented with an overall fraction counting every cell from all experimental repeats. *p*-value was assessed by a two-tailed Cochran-Mantel-Haenszel test using MATLAB. Data in (**h**) was scaled by the mean pP38 intensity of the 2d-U cells. *p*-value was assessed by the Kruskal-Wallis test using MATLAB. The comparison was considered significant if  $p \leq 0.05$ .

**Supplementary Figure 5: Additional representative images for the post-compressed, 7d-U and 7+d-C cells.**

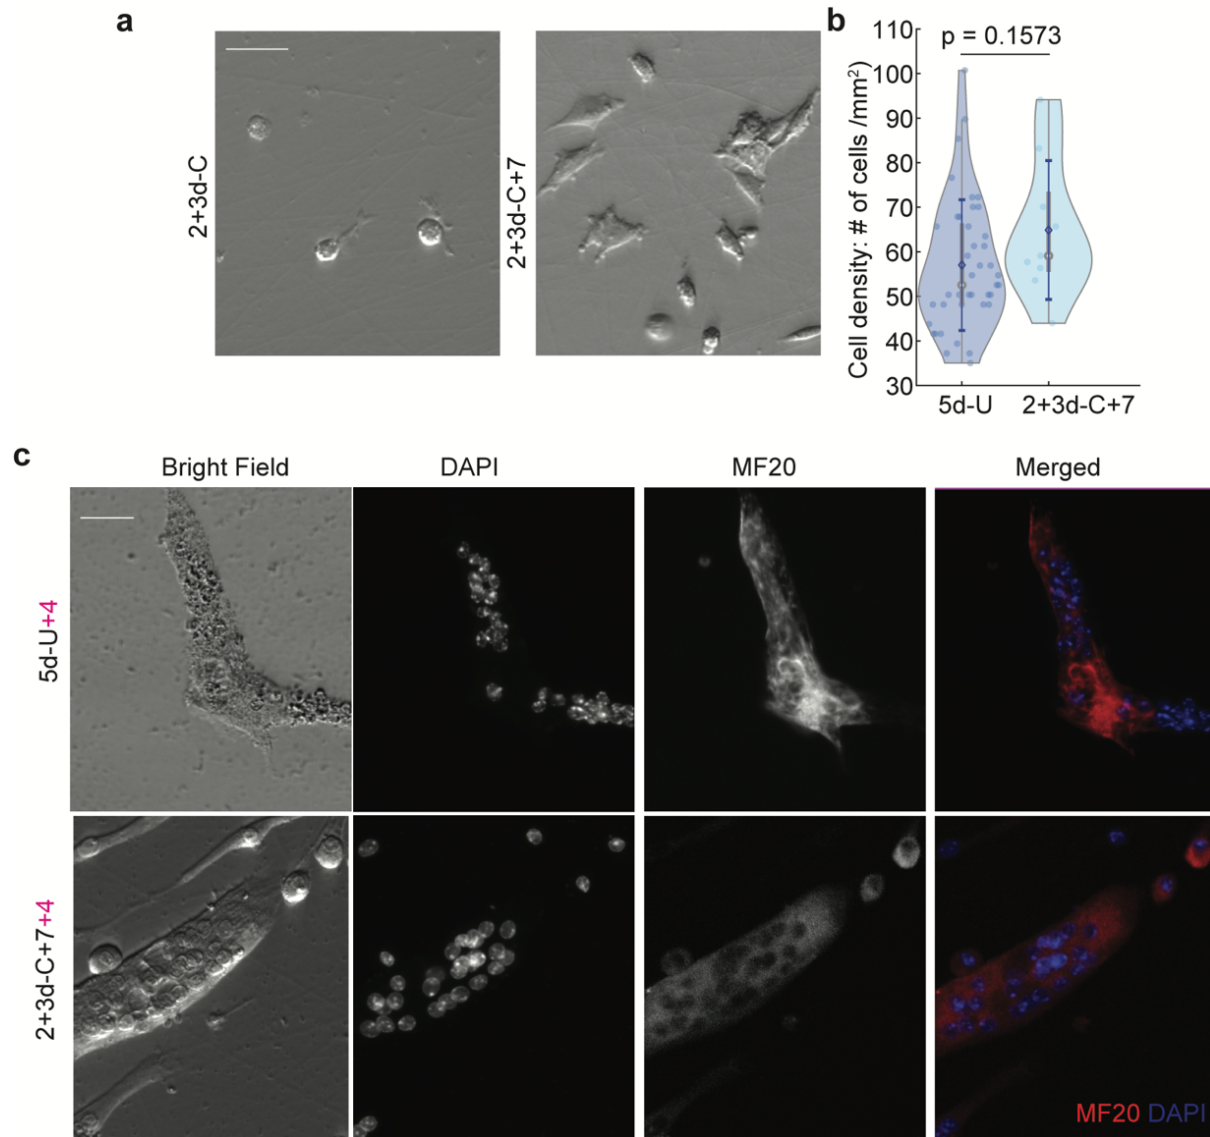

**a**, Bright-field example of cells right after removing compression pillar (2+3d-C) and after 7-day culturing after compression device's removal (2+3d-C+7) (Scale bar, 25  $\mu$ m). **b**, Cell density comparison between 5d-U and 2+3d-C+7. **c**, Examples 5d-U and 2+3d-C+7 cells after 4-day culturing in differentiation medium, designated as 5d-U+4 and 2+3d-C+7+4, respectively (Scale bar, 25  $\mu$ m). **d**, Representative images (split-channel images and merged-channel images) of



Pax7 and MyoD staining for 7d-U and 7+3d-C cells (Scale bar, 25  $\mu\text{m}$ ). **(b)** The sample selected for cell density quantification is the same sample presented in **Fig. 1j,k**. Data is presented with  $\pm$ s.d. Ten fields of view were selected for 2+3d-C+7+4 sample and Forty-two fields of view were selected for 5d-U+4 samples. *p*-value was assessed with student's two-tail t-test using MATLAB. Comparison was considered significant if  $p \leq 0.05$

Supplementary Figure 6: Model illustration and additional analysis and representative images for tension manipulation experiments on MuSCs.

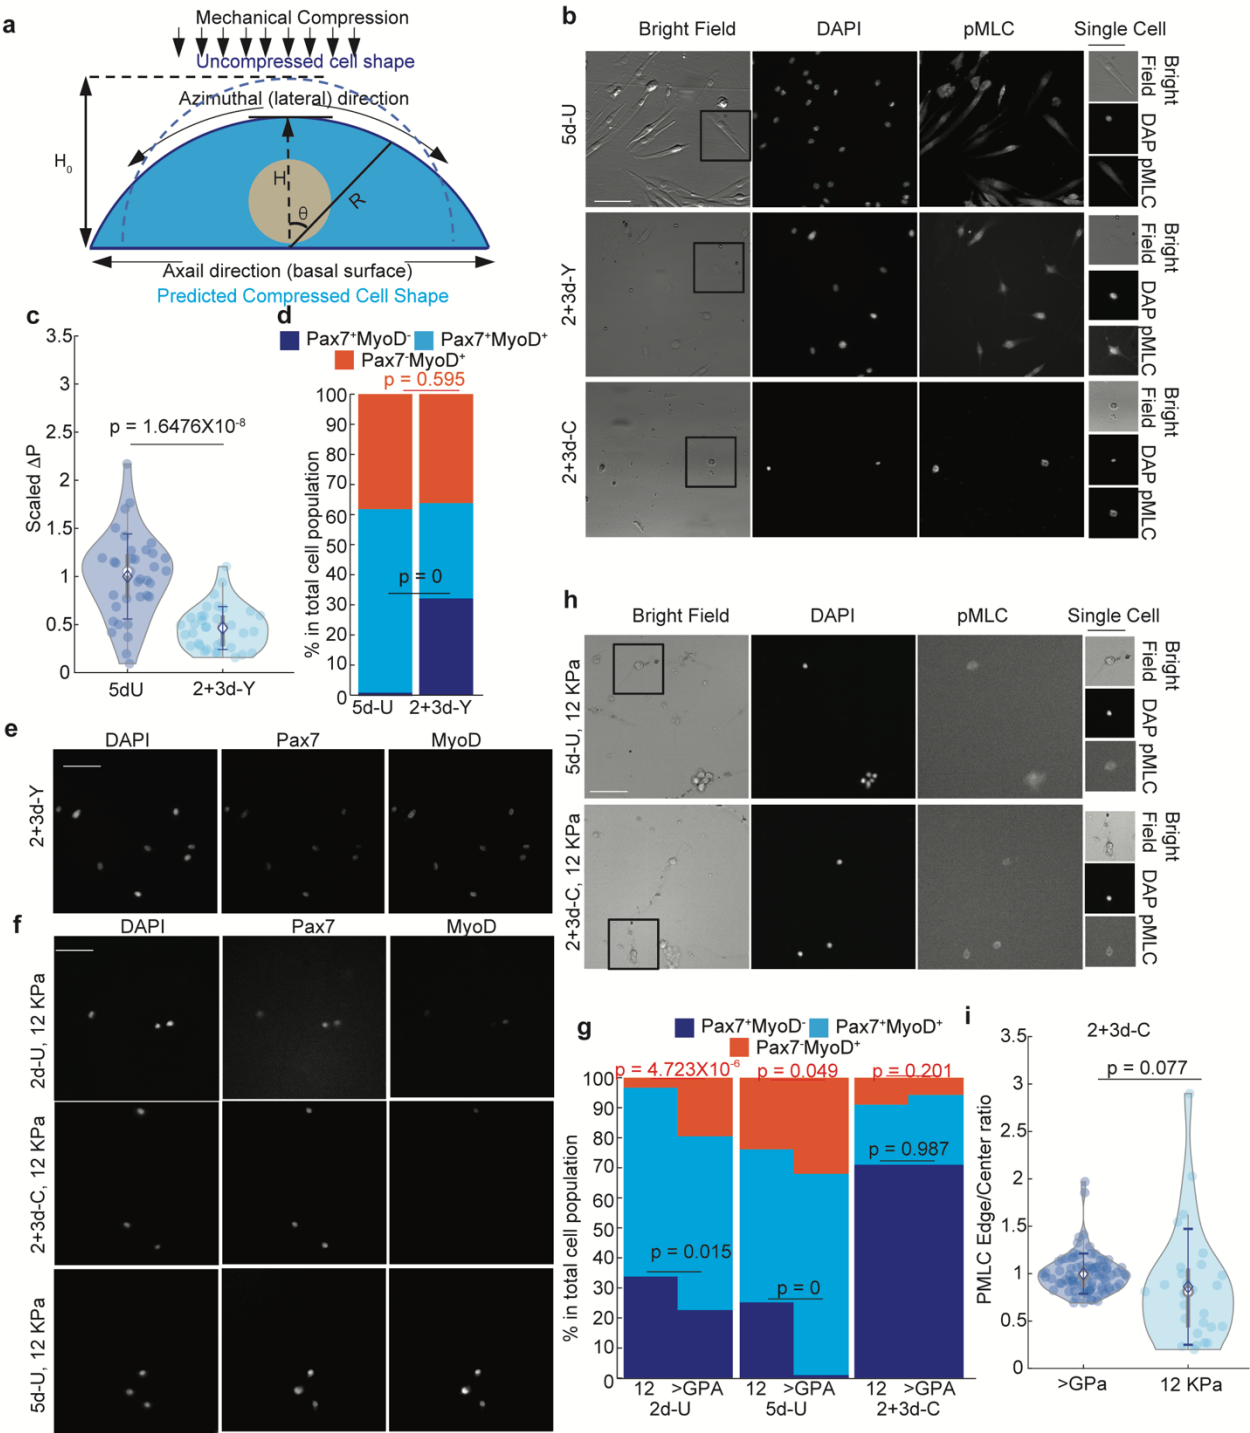

**a**, Cell surface is discretized by azimuthal radius,  $R$  and azimuthal angle,  $\theta$ . This illustration shows uncompressed cell shape (dotted line, with height  $H_0$ ), and predicted cell shape with a height,  $H$ . **b**, Representative images of pMLC distribution for 5d-U, 2+3d-C and 2+3d-Y cells seeded on plastic (Scale bar, 25  $\mu\text{m}$ ). **c**, Comparison of measured pressure between 5d-U and 2+3d-Y cells by AFM. (5d-U cells pressure data is the same as the plastic data in **Fig. 2g**.  $n=7$  for 2+3d-Y sets, of total 35 cells). **d**, Cell fate comparison between 5d-U and 2+3d-Y cells. (2+3d-Y's cell fate data is the same as in **Fig. 2e**;  $n=3$  for 5d-U sets, of total 985 cells). **e,f**, Representative images of Pax7 and MyoD expression for 2+3d-Y cells (**e**) and 2d-U, 5d-U, and 2+3d-C cells seeded on 12 KPa hydrogel (**f**) (Scale bar, 25  $\mu\text{m}$ ). **g**, Cell fate comparisons of 2d-U, 5d-U and 2+3d-C between cells seeded on plastic and 12 KPa hydrogel. (All plastic-seeded cell data is the same as in **Fig. 1c**. All 12 KPa hydrogel-seeded cell data is the same as in **Fig. 2i**). **h**, Representative images of pMLC distribution for 5d-U and 2+3d-C cells seeded on 12KPa hydrogel (Scale bar, 25  $\mu\text{m}$ ). **i**, scaled pMLC Edge/Center ratio for 2+3d-C cells seeded on plastic (>GPa) and 12 KPa hydrogel. (Same data presented in **Fig. 2c** for cells seeded on plastic and **Fig. 2k** for cells seeded on 12 KPa hydrogel.) Data in (**c**) and (**i**) is presented with  $\pm$ s.d.  $p$ -value was assessed with student's two-tail t-test using MATLAB. Data in (**d**) and (**g**) is presented by overall fraction.  $p$ -value was assessed based on two-tailed Cochran-Mantel-Haenszel test using MATLAB. Comparison was considered significant if  $p \leq 0.05$

Supplementary Figure 7: Additional RNA-seq analysis.

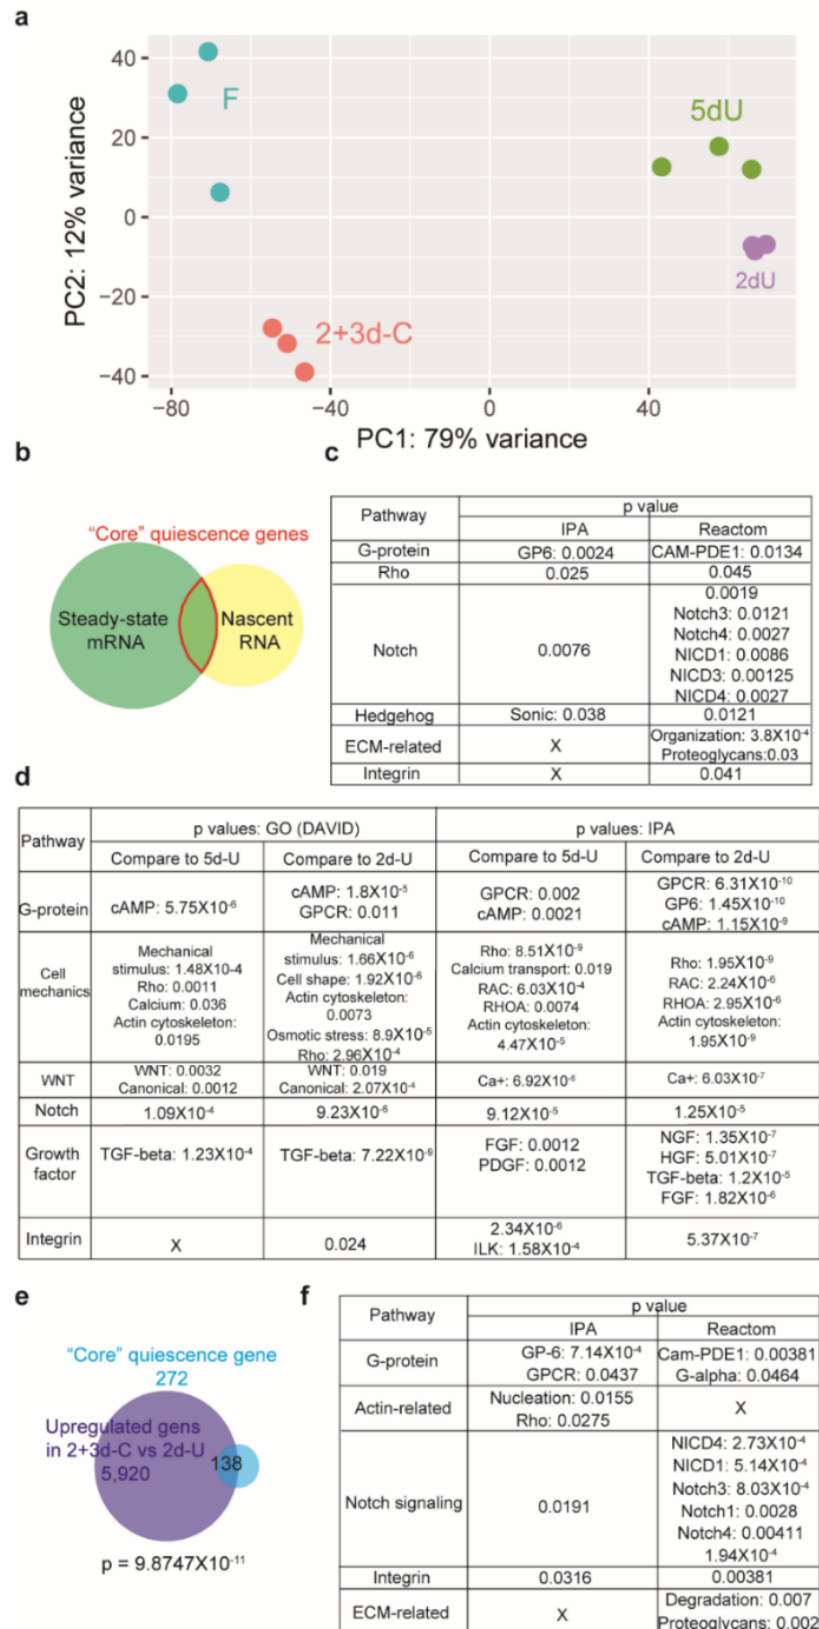

**a**, PCA plot for 5d-U, F and 2+3d-C samples. **b**, Comparison of upregulated genes between steady-state mRNA and nascent mRNA, respectively, based on Ref. 28 and 29, respectively. **c**, Pathway analyses on “core” quiescence genes. **d**, Pathway analyses on all upregulated genes in 2+3d-C compared to 5d-U or F and 2d-U cells. **e**, Comparison between upregulated genes in 2+3d-C cells, relative to 2d-U cells, and “core” quiescence genes. **f**, Pathway analysis on the overlapped “core” quiescence genes in **(e)**. *p*-values in **(c)**, **(d)**, and **(f)** were calculated from each respective pipeline. The pathway is significantly enriched if  $p < 0.05$ ; otherwise, a “X” is marked. *p*-value in **(e)** was calculated by Fisher’s exact method.

Supplementary Figure 8: Representative images related to Notch pathway investigation.

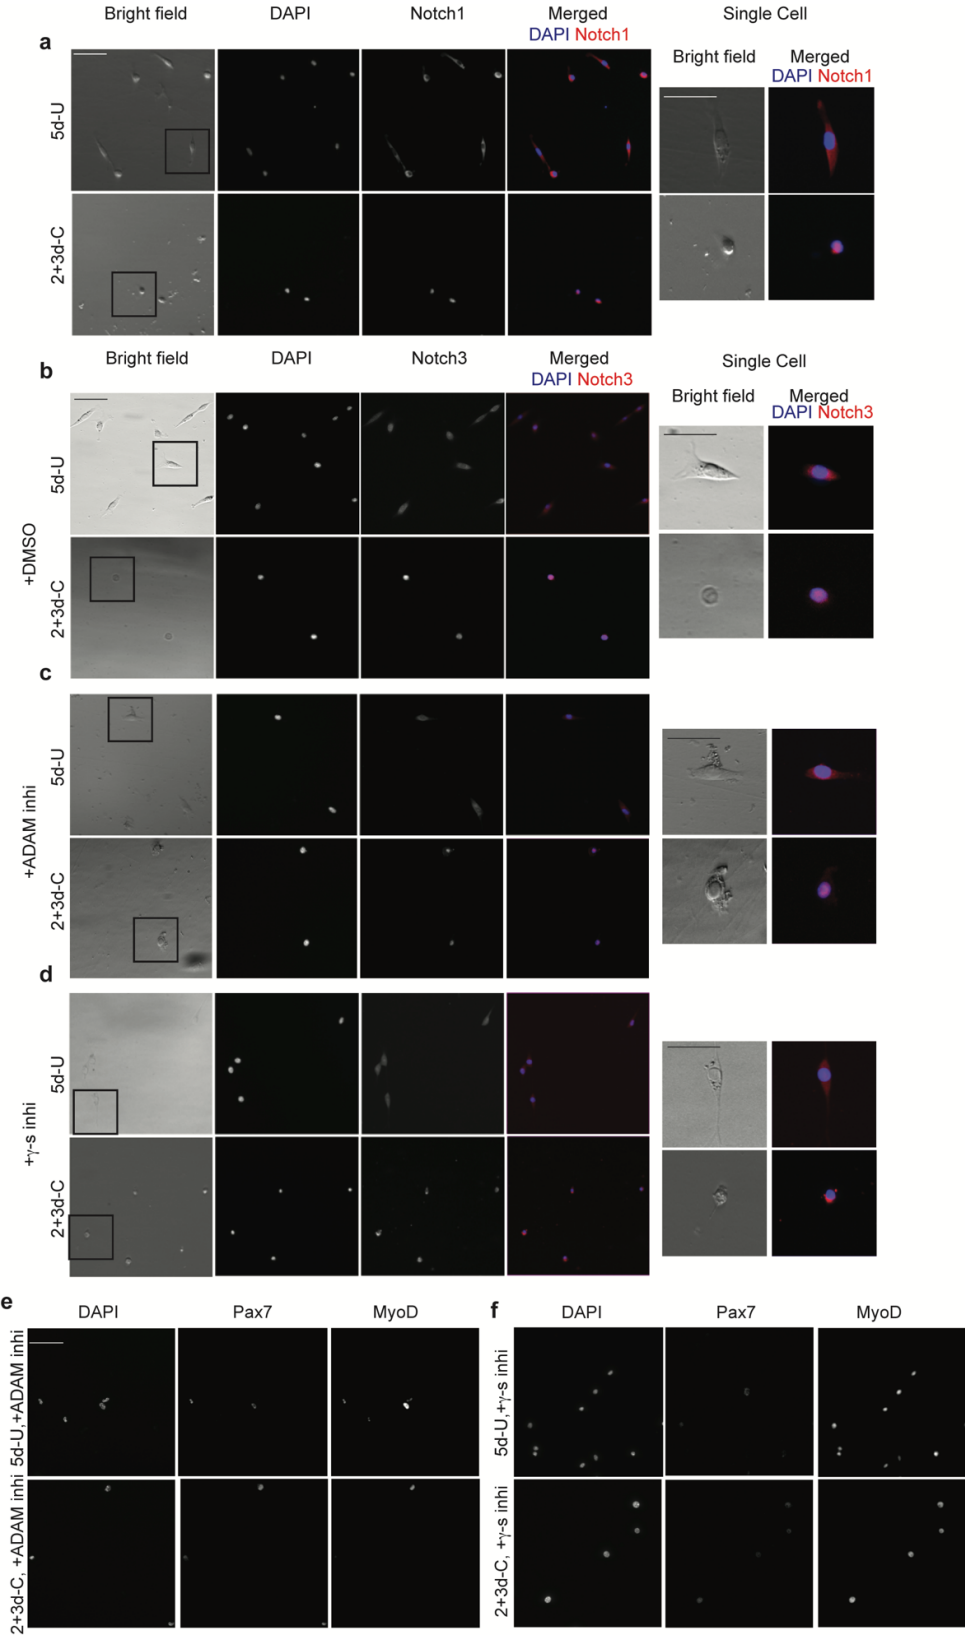

**a,b**, Representative images of Notch1 (**a**) and Notch3 (**b**) of 5d-U and 2+3d-C cells (Scale bar, 25  $\mu$ m). **c,d**, Representative images of Notch3 in 5d-U and 2+3d-C cells when treated with ADAM inhi (**c**) and  $\gamma$ -s inhi (**d**). (Scale bar, 25  $\mu$ m). **e,f**, Representative images of Pax7 and MyoD for 5d-U and 2+3d-C cells when treated with ADAM inhi (**e**) and  $\gamma$ -s inhi (**f**). (Scale bar, 25  $\mu$ m).

**Supplementary Figure 9: Technical details of AFM data-fitting.**

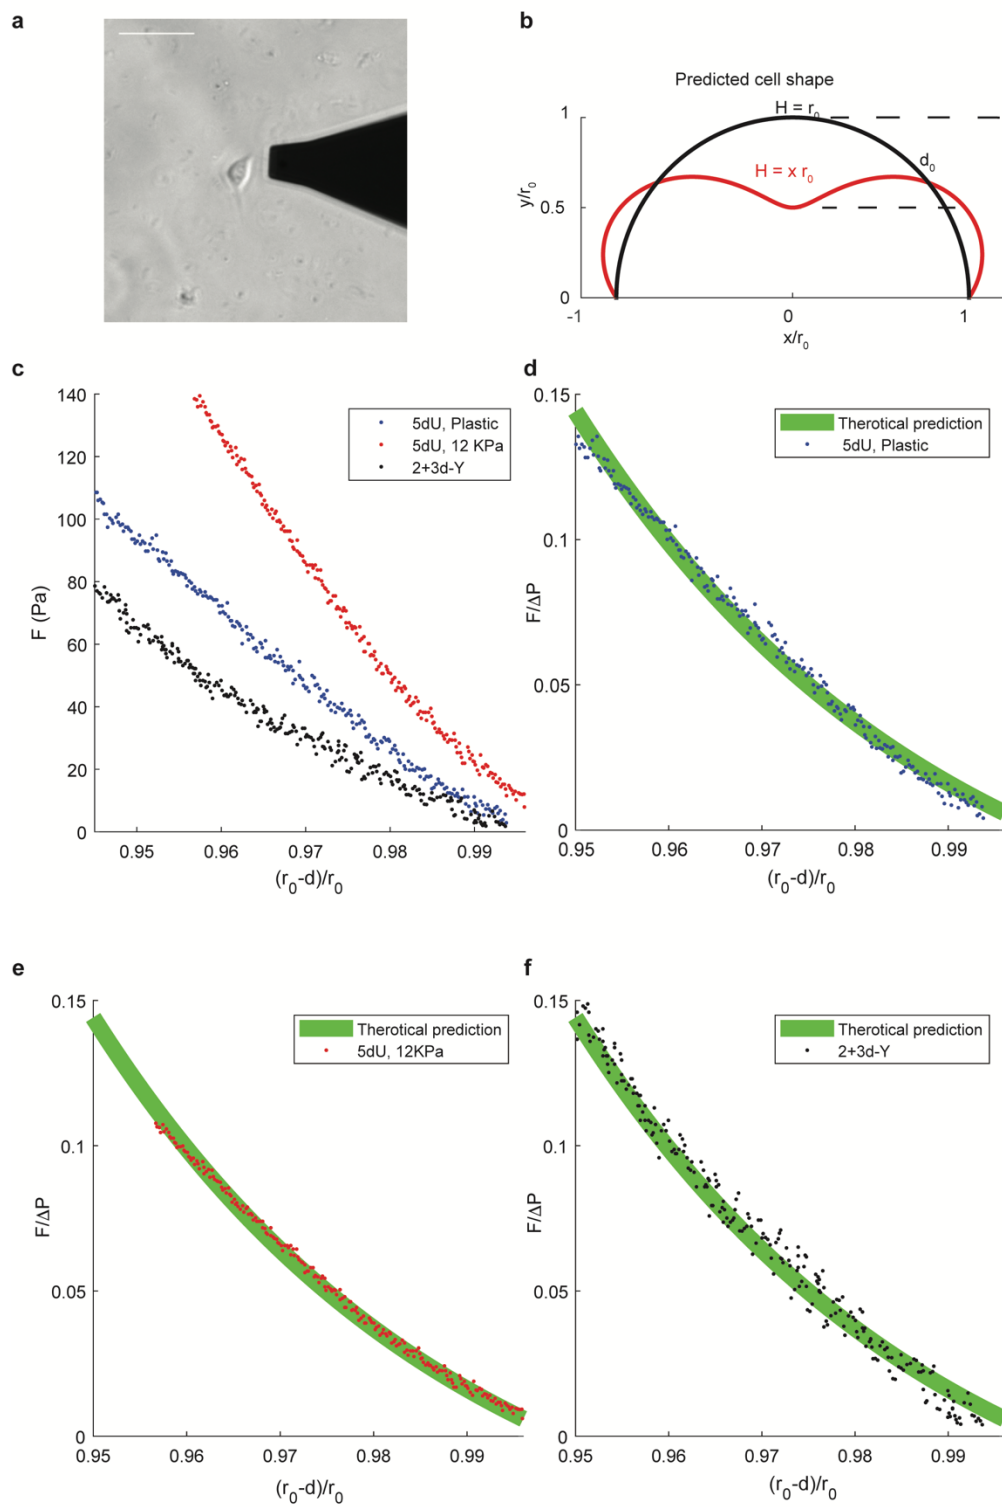



**a**, Illustration of AFM cantilever approaching a cell (Scale bar, 20  $\mu\text{m}$ ). **b**, Theoretical cell shape before (black) and after (red line) indentation. **c**, Example of indentation strain-responding stress (F) curves of 5d-U cells on plastic and 12 KPa hydrogel, and 2+3d-Y cells. **d-f**, Fitting indentation curves for 5d-U cells on plastic (**d**), and on 12 KPa hydrogel (**e**) and 2+3d-Y cells (**f**) with theoretical indentation strain- $\frac{F}{\Delta P}$  curve to calculate  $\Delta P$ .

## Supplementary Figure 10: Cell boundary tracing and quantification for immunostaining images.

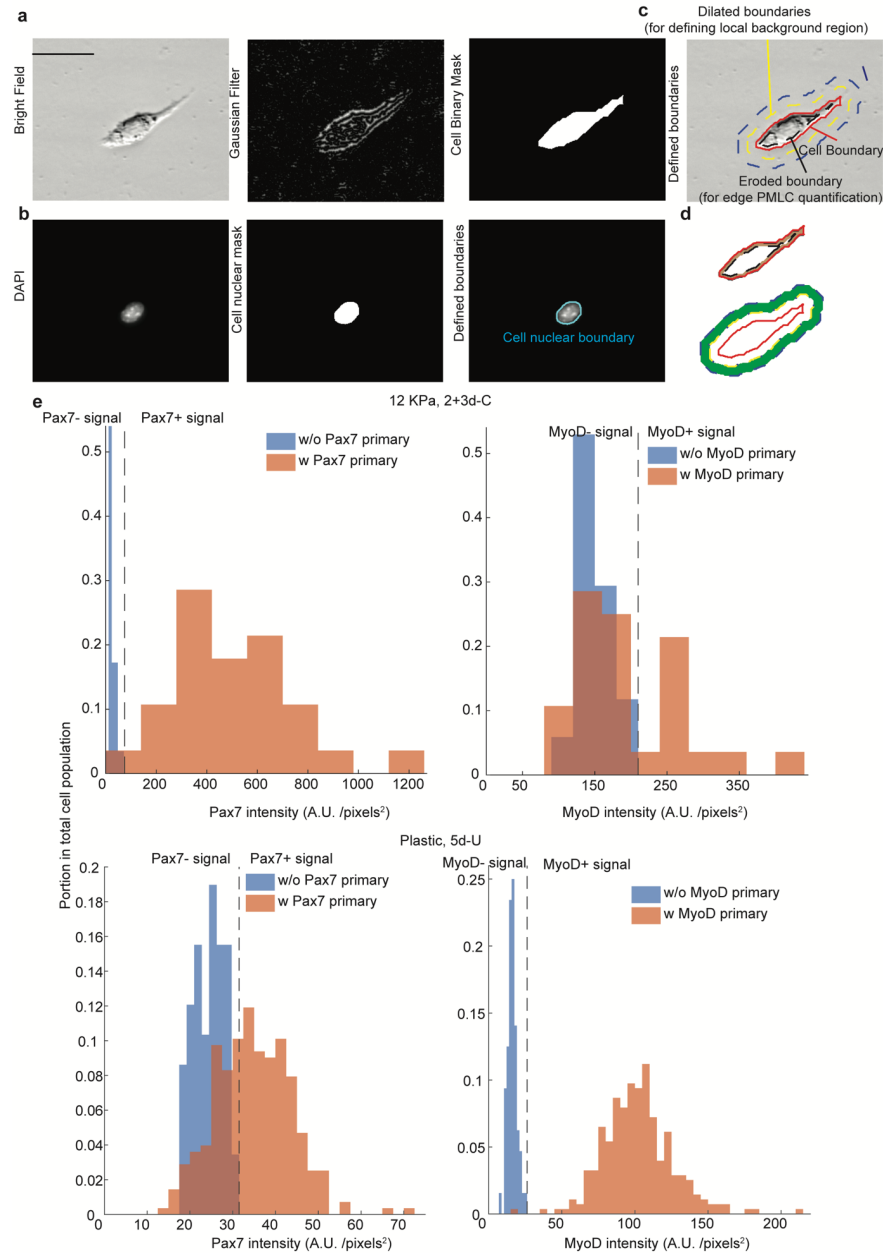

**a**, Example of cell-boundary tracing using bright field. **b**, Example of cell nucleus boundary tracing using DAPI channel. **c-d**, traced cell boundary shown in **(a)** and the respective dilated/eroded boundary. **e**, Example of Pax7 and MyoD intensity histograms for 2+3d-C cells on 12 KPa hydrogel and 5d-U cells on plastic.

**Supplementary Table 1: Normalized reads (RPKM) for MuSCs quiescent genes (Fig. 3b)**

| Gene          |          |          |          |          |          |          |          |          |          |          |          |          |
|---------------|----------|----------|----------|----------|----------|----------|----------|----------|----------|----------|----------|----------|
| Name          | 5d-U, 1  | 5d-U,2   | 5d-U, 3  | 2d-U,1   | 2d-U,2   | 2d-U,3   | 2+3d-C,1 | 2+3d-C,2 | 2+3d-C,3 | F,1      | F,2      | F,3      |
| <b>Pax7</b>   | 845.1699 | 312.988  | 702.0297 | 970.3942 | 847.9054 | 920.4957 | 2190.795 | 2263.341 | 1650.58  | 439.3624 | 606.6024 | 284.5239 |
| <b>Calcr</b>  | 30.57462 | 0        | 3.358994 | 3.868039 | 0        | 0        | 2038.514 | 736.9016 | 1228.917 | 475.2287 | 2335.244 | 110.5345 |
| <b>Tenm4</b>  | 61.14924 | 6.853753 | 50.38491 | 17.40617 | 0        | 1.834875 | 2411.674 | 1706.02  | 3918.106 | 732.8141 | 669.7171 | 390.9645 |
| <b>Col5a1</b> | 330.8611 | 316.0342 | 304.5488 | 385.3534 | 164.2539 | 492.3582 | 5623.186 | 1362.339 | 6009.007 | 6556.2   | 1822.145 | 2858.544 |
| <b>Col5a3</b> | 46.95388 | 11.42292 | 23.51296 | 38.68039 | 72.13855 | 0        | 6144.734 | 860.7506 | 4992.787 | 7478.128 | 1144.246 | 3027.416 |
| <b>Col6a1</b> | 60.05729 | 13.70751 | 16.79497 | 8.703087 | 0        | 0        | 5437.335 | 944.3487 | 6047.566 | 30905.35 | 4578.153 | 26549.77 |
| <b>Col6a2</b> | 31.66657 | 3.046112 | 13.43598 | 76.87727 | 49.94207 | 0        | 1700.87  | 380.8357 | 1751.331 | 19175.44 | 1356.966 | 13071.72 |
| <b>Cdkn1c</b> | 29.48267 | 109.66   | 304.5488 | 10.63711 | 0        | 0        | 664.0983 | 2724.678 | 1497.587 | 1521.873 | 1935.517 | 1998.832 |
| <b>Gas1</b>   | 395.2862 | 1484.98  | 971.8689 | 983.9323 | 1201.939 | 888.0795 | 3921.342 | 2117.818 | 1665.506 | 3624.129 | 3508.71  | 4619.931 |
| <b>Pmp22</b>  | 599.481  | 164.4901 | 222.8133 | 450.143  | 549.3628 | 558.4137 | 7293.405 | 14208.58 | 4046.222 | 17964.95 | 21605.1  | 20312.76 |
| <b>Ptprz1</b> | 200.9189 | 0        | 24.63262 | 51.73502 | 27.7456  | 0        | 2018.567 | 709.0356 | 1052.291 | 735.2595 | 1313.721 | 369.4717 |
| <b>Tek</b>    | 63.33314 | 12.18445 | 16.79497 | 33.36183 | 0        | 25.68825 | 1730.548 | 191.966  | 1733.918 | 4003.985 | 3666.497 | 2756.197 |
| <b>Apoe</b>   | 358.1598 | 28.93807 | 208.2576 | 166.8092 | 172.0227 | 129.0529 | 33008.85 | 102200.2 | 62898.67 | 16513.99 | 35339.56 | 17691.66 |
| <b>Rgs2</b>   | 193.2753 | 28.17654 | 139.9581 | 33.84534 | 37.73401 | 47.70675 | 500.1414 | 1142.507 | 426.6382 | 1229.237 | 4752.303 | 823.8912 |
| <b>Spry1</b>  | 571.0902 | 335.0724 | 278.7965 | 1416.186 | 1464.967 | 1237.317 | 23414.21 | 20648.73 | 17092.89 | 6645.866 | 9478.893 | 5319.983 |

**Supplementary Table 2: Normalized reads (RPKM) for MuSCs quiescent genes (Fig. 3c)**

| Gene         |          |          |          |          |          |          |          |          |          |          |          |          |
|--------------|----------|----------|----------|----------|----------|----------|----------|----------|----------|----------|----------|----------|
| Name         | 5d-U, 1  | 5d-U,2   | 5d-U, 3  | 2d-U,1   | 2d-U,2   | 2d-U,3   | 2+3d-C,1 | 2+3d-C,2 | 2+3d-C,3 | F,1      | F,2      | F,3      |
| <b>Myog</b>  | 14.19536 | 19131.11 | 37916.32 | 83.16283 | 19.97683 | 73.395   | 0.486519 | 0        | 0        | 161.3984 | 37.4013  | 10988.97 |
| <b>Mki67</b> | 1131.261 | 683.8522 | 957.3133 | 498.01   | 752.4606 | 601.839  | 0.973038 | 0        | 0        | 245.3582 | 148.4364 | 227.2097 |
| <b>Mcm2</b>  | 3490.967 | 6211.785 | 1538.419 | 11564.95 | 11977.22 | 12115.07 | 178.0659 | 74.3094  | 0        | 411.6475 | 425.4398 | 720.521  |
| <b>Bub1</b>  | 1722.006 | 1796.445 | 972.9886 | 1787.517 | 2431.624 | 1923.561 | 0        | 0        | 0        | 71.73264 | 46.75163 | 98.25286 |
| <b>Plk1</b>  | 3414.53  | 4740.512 | 3204.48  | 6553.908 | 5688.957 | 6173.743 | 0.486519 | 0        | 0        | 44.8329  | 43.24526 | 355.1432 |
| <b>Ccne1</b> | 1751.489 | 3506.075 | 3342.199 | 3896.082 | 4000.915 | 3609.199 | 41.84063 | 0        | 2.487687 | 100.2627 | 112.2039 | 373.5656 |
| <b>Ccnb1</b> | 5960.959 | 9004.308 | 6627.295 | 8560.453 | 9507.861 | 9334.01  | 33.56981 | 3.096225 | 0        | 92.11123 | 156.618  | 567.0009 |
| <b>Gmnn</b>  | 1668.501 | 2100.294 | 5712.529 | 1782.199 | 1908.897 | 1919.891 | 0        | 0        | 99.50746 | 54.61462 | 99.34721 | 192.4119 |
| <b>Cdc6</b>  | 2283.269 | 1690.592 | 1301.05  | 4009.706 | 3731.228 | 4310.733 | 0        | 0        | 97.01978 | 185.0376 | 330.7678 | 283.5004 |
| <b>Cdc45</b> | 2032.12  | 2366.068 | 1926.943 | 3110.387 | 2826.721 | 2450.782 | 107.0342 | 182.6773 | 0        | 128.7927 | 188.1753 | 300.8994 |
| <b>Cdc7</b>  | 911.7789 | 769.9049 | 357.173  | 1007.624 | 1059.882 | 974.9303 | 145.4692 | 151.715  | 24.87687 | 166.2893 | 246.6148 | 192.4119 |
| <b>Top2a</b> | 3622.001 | 4523.477 | 2950.316 | 4737.38  | 3576.962 | 3248.952 | 144.0096 | 77.40563 | 52.24142 | 371.7055 | 556.3444 | 839.2432 |

**Supplementary Table 3: Normalized reads (RPKM) for Notch downstream genes (Fig. 3f)**

| Gene           |          |          |          |          |          |          |          |          |          |          |          |          |
|----------------|----------|----------|----------|----------|----------|----------|----------|----------|----------|----------|----------|----------|
| Name           | 5d-U, 1  | 5d-U,2   | 5d-U, 3  | 2d-U,1   | 2d-U,2   | 2d-U,3   | 2+3d-C,1 | 2+3d-C,2 | 2+3d-C,3 | F,1      | F,2      | F,3      |
| <b>Notch1</b>  | 187.8155 | 46.45321 | 69.41921 | 174.5452 | 39.95366 | 0        | 2667.097 | 229.1207 | 1467.735 | 3745.585 | 779.5834 | 1196.433 |
| <b>Notch2</b>  | 376.723  | 78.43739 | 182.5053 | 25.62576 | 26.63577 | 132.111  | 2301.721 | 164.0999 | 1000.05  | 2208.224 | 473.3603 | 494.3347 |
| <b>Notch3</b>  | 41.49413 | 41.88405 | 237.3689 | 42.54843 | 125.4101 | 114.9855 | 11886.14 | 2003.258 | 10218.17 | 2020.741 | 1514.753 | 733.8261 |
| <b>Hey1</b>    | 38.21828 | 214.7509 | 301.1898 | 79.29479 | 106.5431 | 71.56013 | 1278.572 | 962.926  | 961.4908 | 1313.196 | 2262.779 | 1414.432 |
| <b>Heyl</b>    | 24.02292 | 11.42292 | 59.34223 | 61.40511 | 19.97683 | 38.53238 | 10197.92 | 4576.221 | 22812.09 | 6838.24  | 6333.677 | 3651.731 |
| <b>Hes6</b>    | 8910.318 | 45369.56 | 181827.9 | 10070.44 | 13580.91 | 9775.603 | 308.453  | 275.564  | 212.6972 | 146.7259 | 174.1498 | 8018.866 |
| <b>App</b>     | 1523.271 | 2053.08  | 938.279  | 1085.952 | 690.3104 | 1154.136 | 6406.481 | 2204.512 | 7948.159 | 21391.81 | 11130.39 | 12500.63 |
| <b>S1pr3</b>   | 34.94242 | 9.138337 | 8.957317 | 50.76801 | 44.39295 | 66.0555  | 14516.26 | 3371.789 | 12163.54 | 6355.675 | 10409.25 | 7468.241 |
| <b>Dtx3</b>    | 561.2627 | 434.071  | 517.2851 | 612.6006 | 649.2469 | 588.9949 | 3819.173 | 5557.724 | 4495.25  | 1889.503 | 1008.666 | 2609.842 |
| <b>Dtx4</b>    | 265.344  | 273.3886 | 136.5991 | 770.2232 | 402.8661 | 879.5168 | 3435.31  | 752.3827 | 899.2987 | 1103.704 | 1714.616 | 532.203  |
| <b>Rcan2</b>   | 144.1375 | 70.82211 | 222.8133 | 117.4917 | 46.6126  | 130.8878 | 1428.906 | 1613.133 | 2191.652 | 1080.065 | 2709.257 | 1167.776 |
| <b>Galnt11</b> | 127.7582 | 278.7193 | 213.8559 | 243.6864 | 243.0514 | 351.0728 | 1799.147 | 1102.256 | 1422.957 | 661.0815 | 1018.017 | 756.3423 |
